# Supplementary material for: Loss of microRNA-27b contributes to breast cancer stem cell generation by activating ENPP1
Source: PubMed Central journal article supplement (PMC4490376; doi:10.1038/ncomms8318), 2015-06-12
Supplement: ncomms8318-s1.pdf [file ncomms8318-s1.pdf]

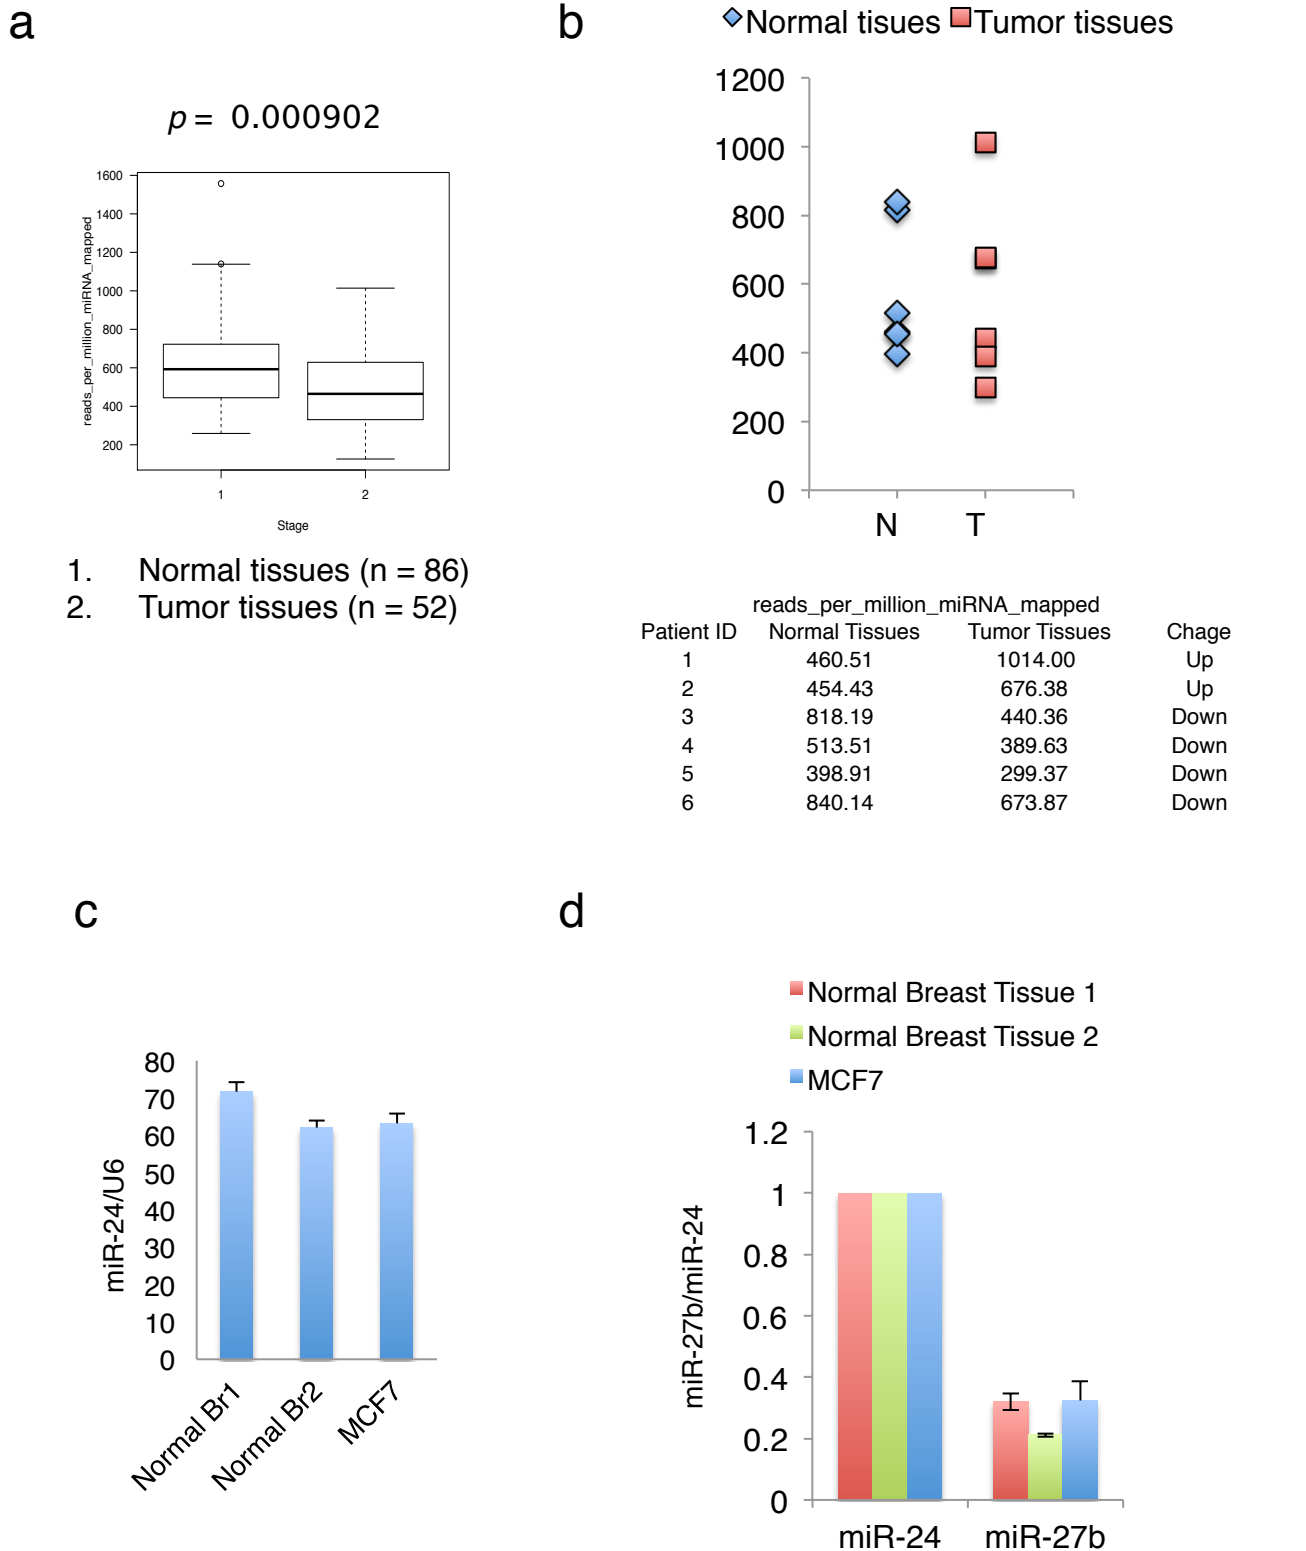

**Supplementary Fig. 1. Expression profile of miR-27b in breast cancer patients.**

(a) Data from The Cancer Genome Atlas showing the miR-27b expression in luminal type breast cancer patients (n = 52) who received the taxane-based adjuvant chemotherapy. The *P*-value was calculated using Mann-Whitney *U* test.

(b) The expression level of miR-27b among the six matched pair cases that contained normal and cancer tissues in (a).

(c, d) Expression profiles of miR-24 and miR-27b in normal breast tissues and MCF7 cells. Data are represented as the mean  $\pm$  SD of n = 3 replicates.

a

miR-27b mature sequence  
 UUCACAGUGGCUAAGUUCUGC  
 5'-TTCACAGTGGCTAAGTTCTGC-3'  
 Complement sequence  
 3'-AAGTGTCACCGATTCAAGACG-5'

b

The sequence inserted in the 3'UTR of miR-27b sensor vector  
 5'-GGATCC-GCAGAACTTAGCCACTGTGAA-GCTAGC-  
 GCAGAACTTAGCCACTGTGAA-GCGGCCGC-3'

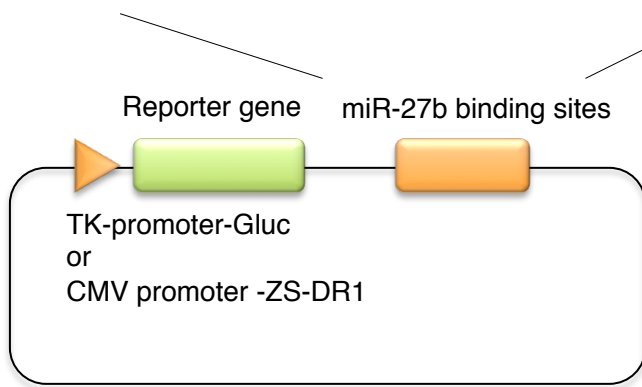

c

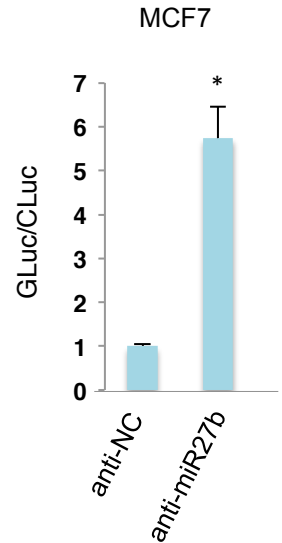

**Supplementary Fig. 2. Establishment of miR-27b knockdown cell lines.**

(a, b) A schematic illustration of the miR-27b sensor construct used in the experiment shown in (b).  
 (c) A dual-luciferase assay showing the efficiency of knockdown of miR-27b in MCF7-luc anti-miR-27b cells. Control cells (MCF7-luc anti-NC) stably expressed a non-specific antisense sequence. The cells were co-transfected with the pTK-GLuc-27bs and pSV40-CLuc vectors expressing *Gaussia* luciferase (GLuc) and *Cypridina* luciferase (CLuc), respectively. The level of miR-27b expression was determined as the ratio of GLuc to CLuc activity. Data are represented as the mean  $\pm$  SD of n = 3 replicates. Statistical significance was determined by Student's *t*-test (\*  $P < 0.05$ ).

**a**

miR-27b mature sequence

UUCACAGUGGCUAAGUUCUGC

PPARG 3'UTR

NM\_138711.3

5'\_CAGAGAGTCCTGAGCCACTGCCAACATTTCCCTTC

TTCCAGTTGCACTATTCTGAGGGAAAATCTGACACCT

miR-27b target site

AAGAAATTTACTGTGAAAAAGCATTTTAAAAAGAAAA

GGTTTTAGAATATGATCTATTTTATGCATATTGTTTATAA

AGACACATTTACAATTTACTTTTAATATTTAAAAATTACCA

TATTATGAAATTGCTGATAGTA\_3'

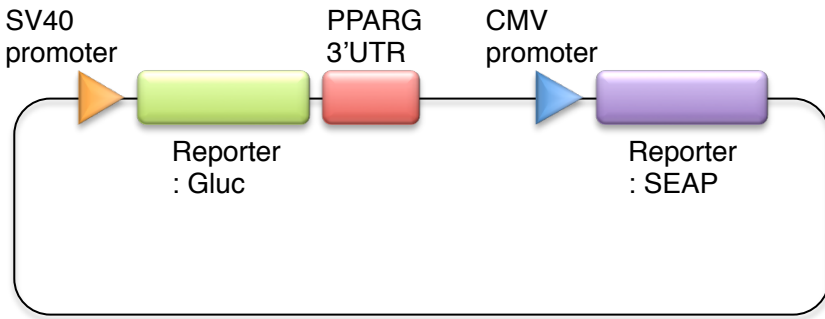

**b**

MCF7 cells derivatives

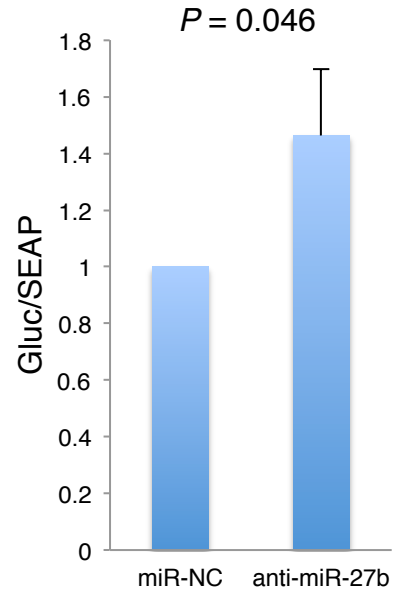

**c**

MCF7 cells derivatives

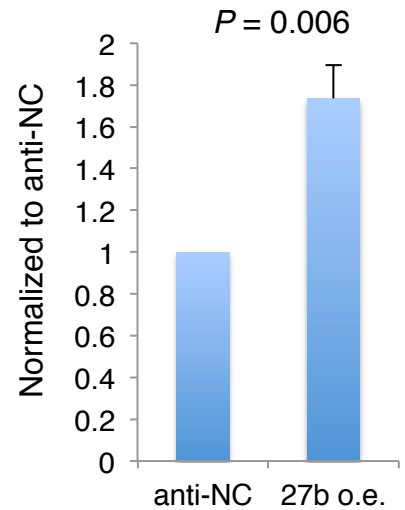

**d**

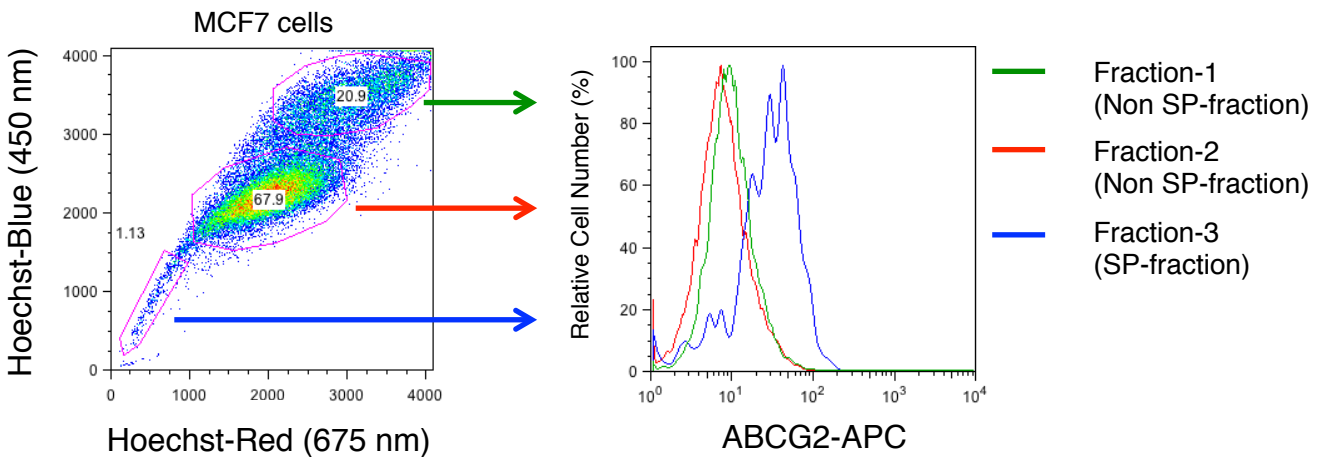

**Supplementary Fig. 3. Construction of the *PPARG* 3'UTR vector.**

(a) A schematic illustration of the *PPARG* 3'UTR vector.

(b) A dual-luciferase assay showing the efficiency of knockdown of miR-27b in MCF7-luc anti-miR-27b cells. MCF7-luc anti-NC or MCF7-luc anti-miR-27b cells were transfected with the *PPARG* 3'UTR vector shown in (a). The level of miR-27b expression was determined as the ratio of *Gaussia* luciferase (GLuc) to *Cypridina* luciferase (CLuc) activity. Data are represented as the mean  $\pm$  SD of n = 3 replicates. Statistical significance was determined by Student's *t*-test.

(c) Expression of miR-27b in MCF7-luc miR-27b o.e. cells. Data are represented as the mean  $\pm$  SD of n = 3 replicates. Statistical significance was determined by Student's *t*-test.

(d) Flow cytometric analysis of ABCG2 expression in the SP-fraction of MCF7 cells. FSC, forward scatter.



a

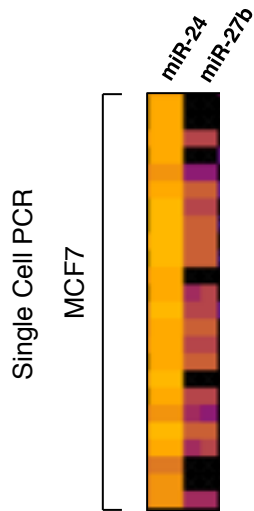

b

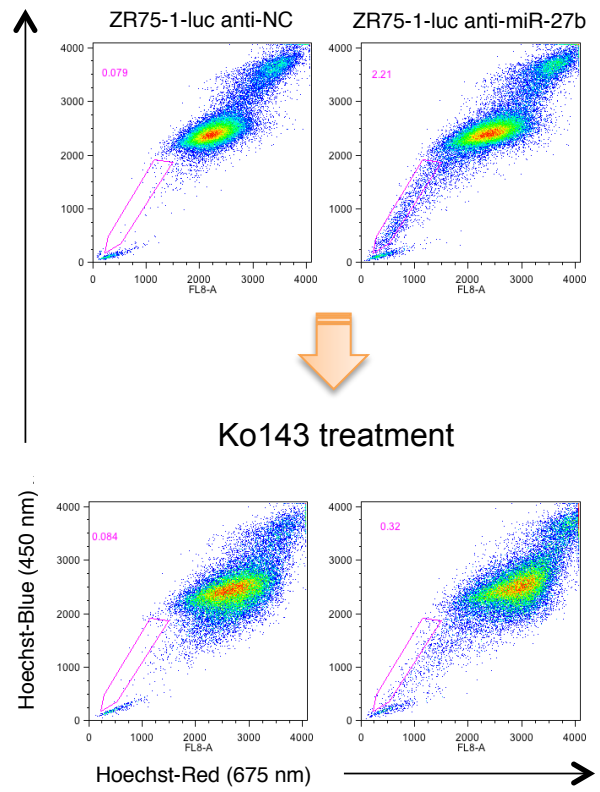

c

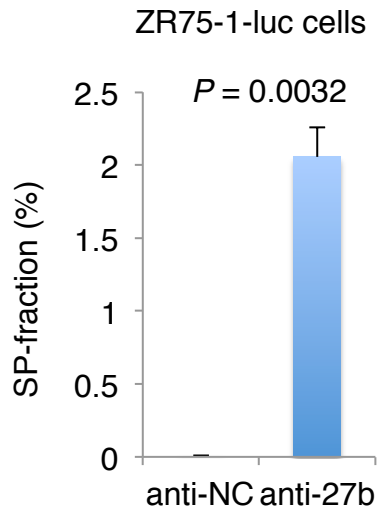

d

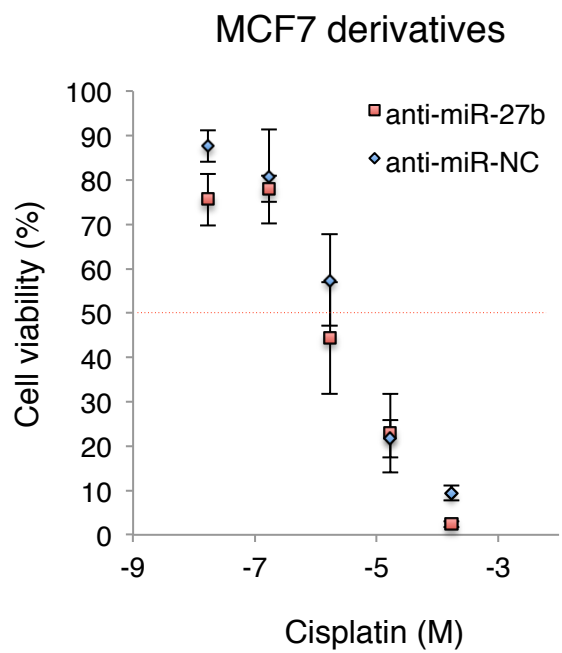

**Supplementary Fig. 4. Down-regulation of miR-27b enhances the SP-fraction of ZR75-1 cells.**

(a) Single cell qRT-PCR analyses of miR-24 and miR-27b expression in MCF7 cells. Expression levels were normalized to those of *RNU6B*.

(b) Flow cytometric analysis of the SP-fractions of ZR75-1-luc derivatives.

(c) Quantification of the SP-fractions of ZR75-1-luc derivatives. The SP-fraction was determined as the difference between the level of Hoechst 33342 staining in the presence and absence of the ABCG2 inhibitor Ko143. Data are represented as the mean  $\pm$  SD of  $n = 3$  replicates. Statistical significance was determined by Student's *t*-test.

(d) Dose-response curves of MCF7-luc anti-NC and MCF7-luc anti-miR-27b cells treated with cisplatin. Cell viability was normalized to that of the corresponding cells treated with DMSO. The red dashed line indicates the  $IC_{50}$  value. Data are represented as the mean  $\pm$  SD of  $n = 3$  replicates.

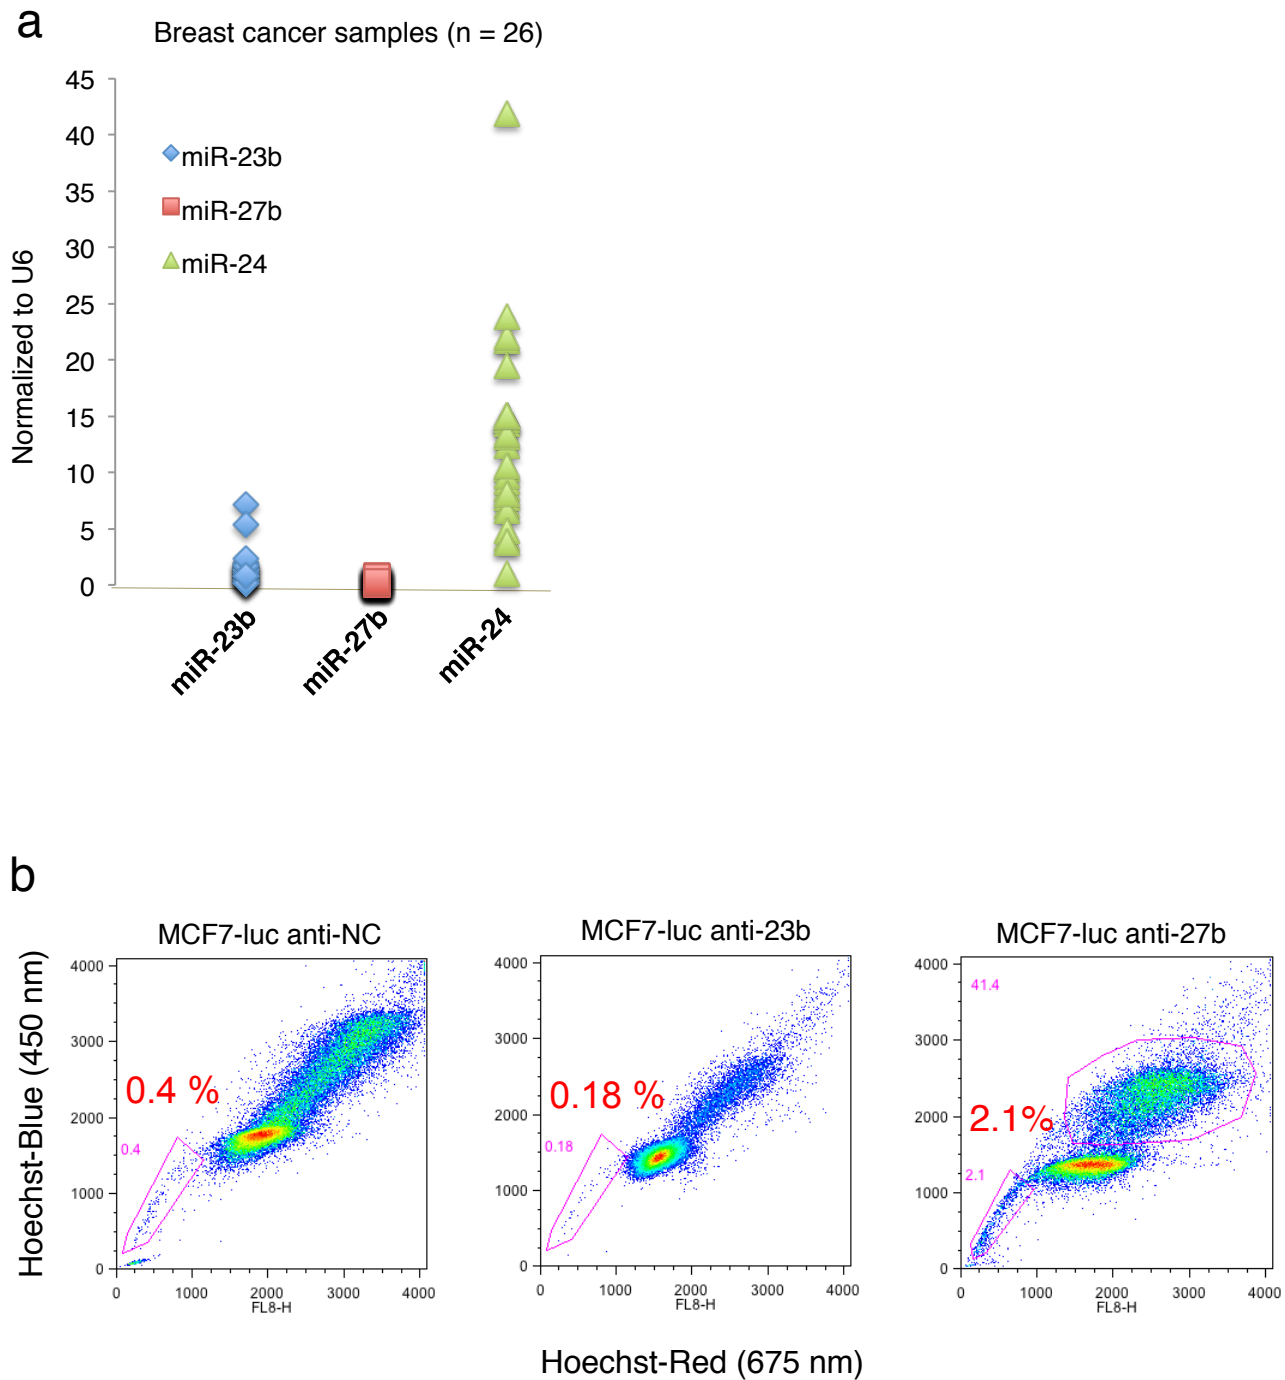

**Supplementary Fig. 5. Functional analysis of miR-23b in MCF7 cells.**

(a) Expression levels of miR-23b, miR-27b and miR-24 in NCC patients (n = 26).

(b) Flow cytometric analyses of the SP-fractions of MCF7-luc derivatives.

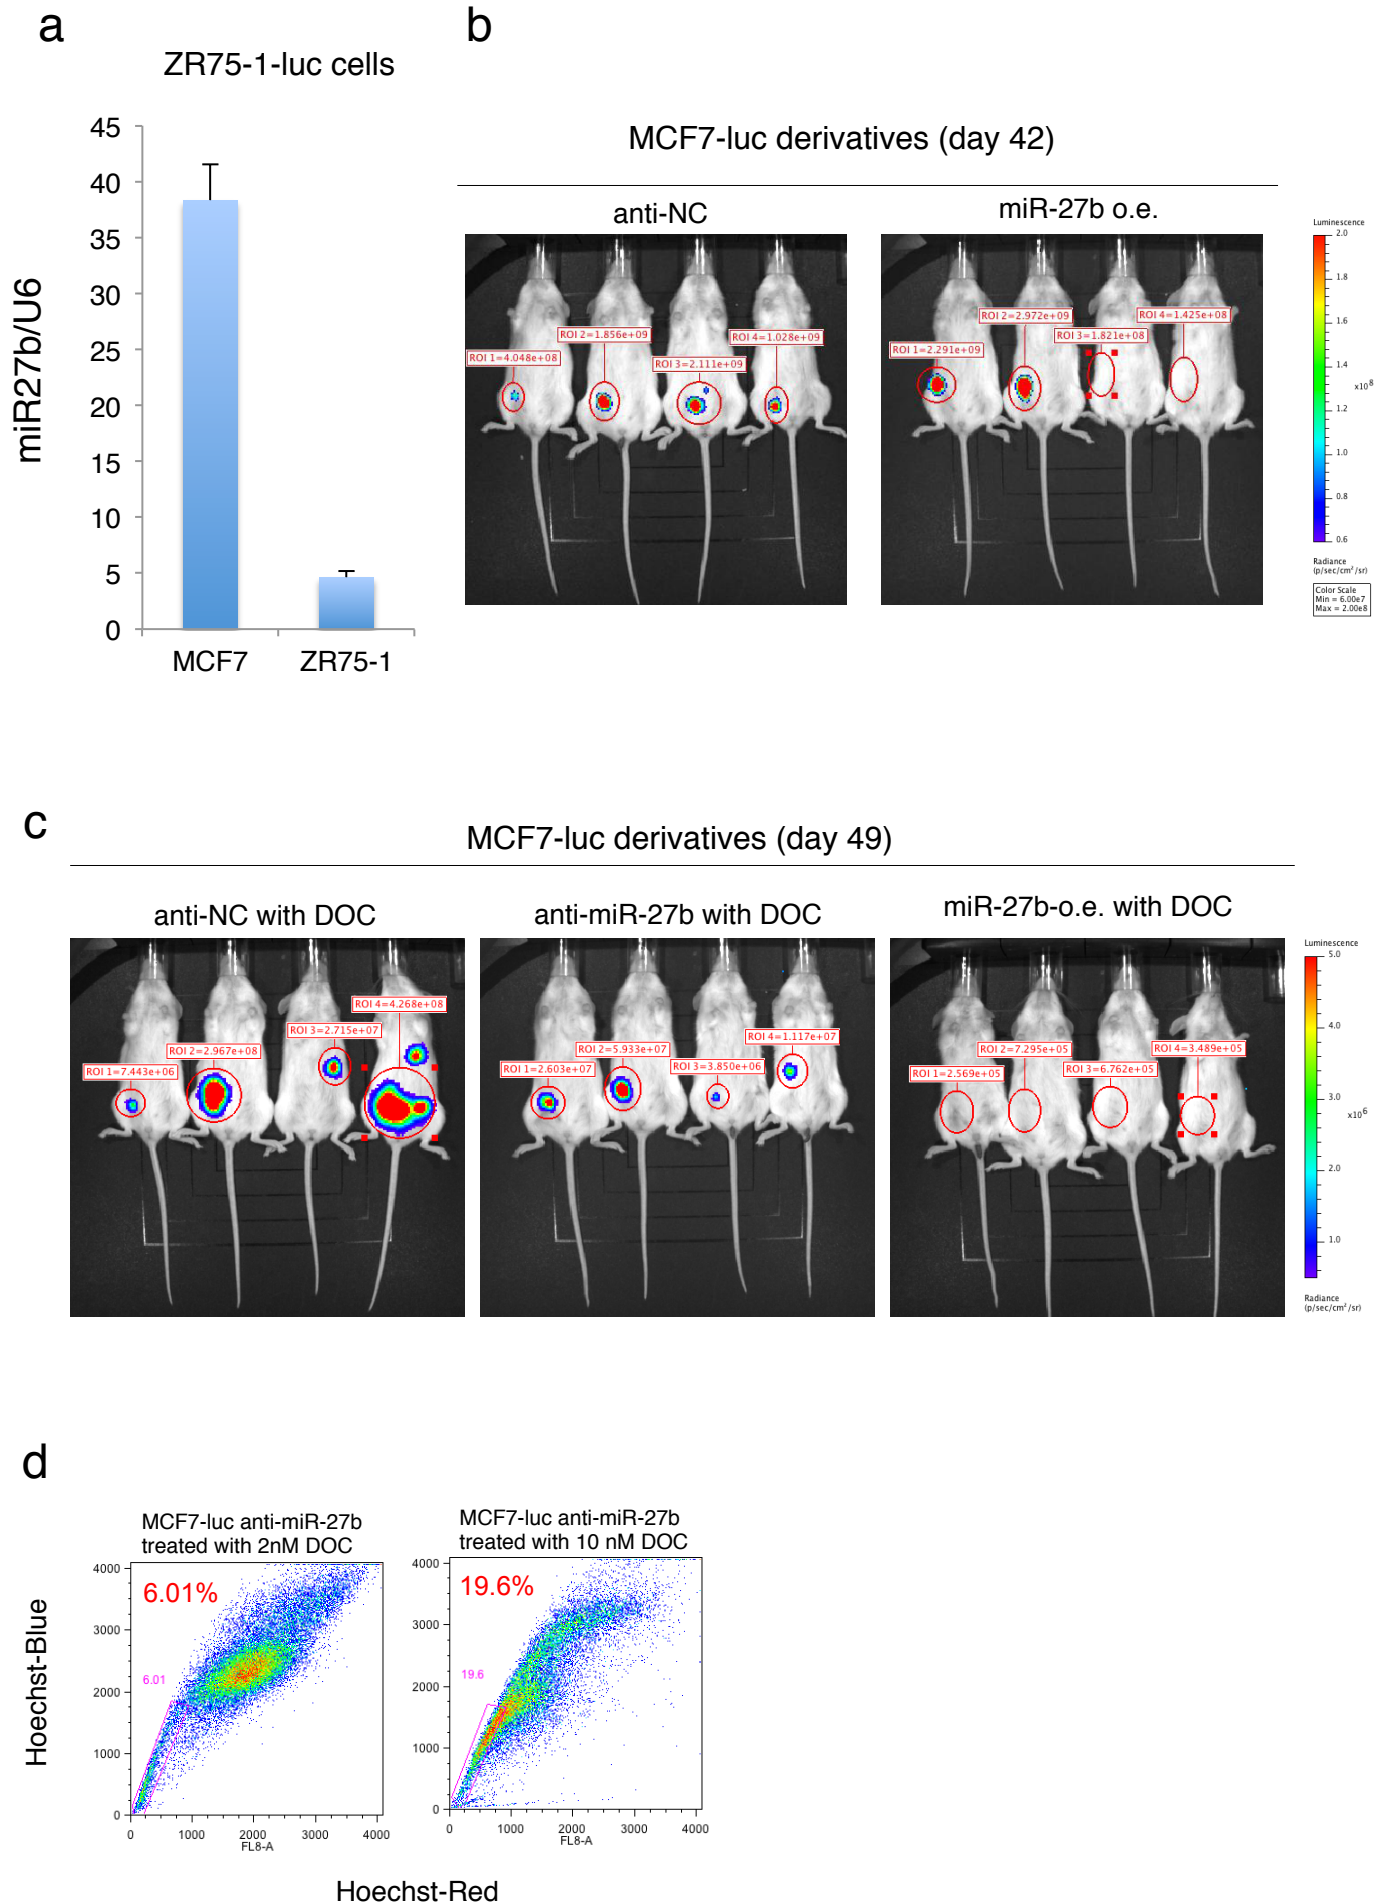

**Supplementary Fig. 6. MiR-27b inhibits the generation of tumorigenic cells in the SP-fraction.**

(a) A qRT-PCR analysis of relative miR-27b expression levels in MCF7 and ZR75-1 cells. The expression level of *RNU6B* was used for normalization. Data are represented as the mean  $\pm$  SD of n = 3 replicates.

(b) Bioluminescent images of tumours in NOD/SCID mice injected with MCF7-luc cell derivatives. The cells were injected into the mammary fat pad of the mice (n = 4 animals and  $10^5$  cells per animal).

(c) Bioluminescent images of tumours in NOD/SCID mice injected with docetaxel-treated MCF7-luc cell derivatives. After exposure to 5 nM docetaxel for 4 days, the cells were injected into the mammary fat pad of the mice (n = 4 animals and  $10^5$  cells per animal).

(d) Flow cytometric analysis of the SP-fraction of MCF7-luc anti-miR-27b cells that were treated with 2 nM or 10 nM docetaxel for 96 h.

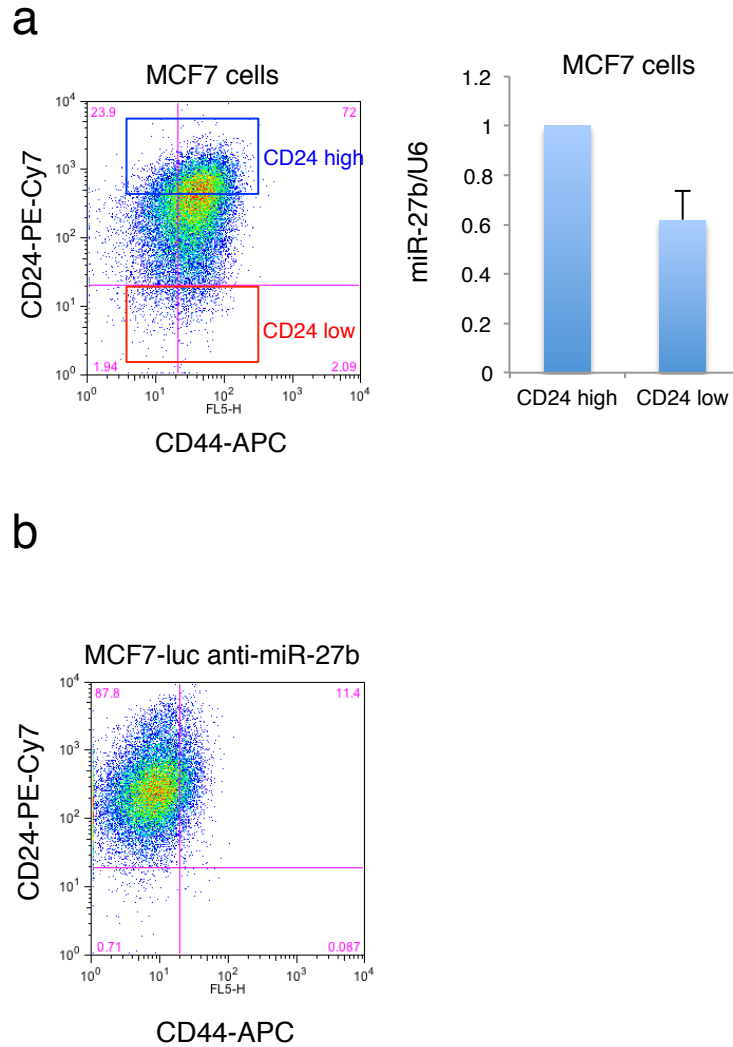

**Supplementary Fig. 7. Expression level of miR-27b in CD24<sup>low</sup> cell fraction.**

(a) QRT-PCR analysis coupled with flow cytometry analysis in MCF7 cells.

(b) Flow cytometry analysis of CD44 and CD24 expression in MCF7-luc anti-miR-27b cells.

a

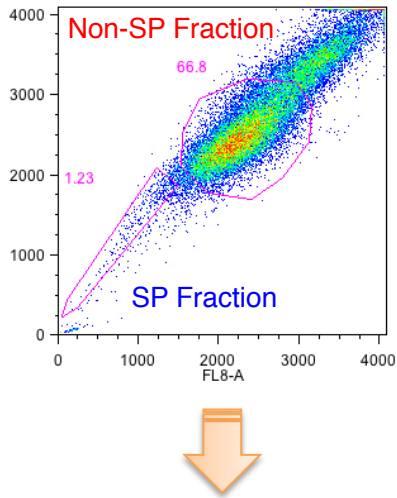

Cell sorting coupled with qPCR  
(Supplementary Fig. 6d and e)

b

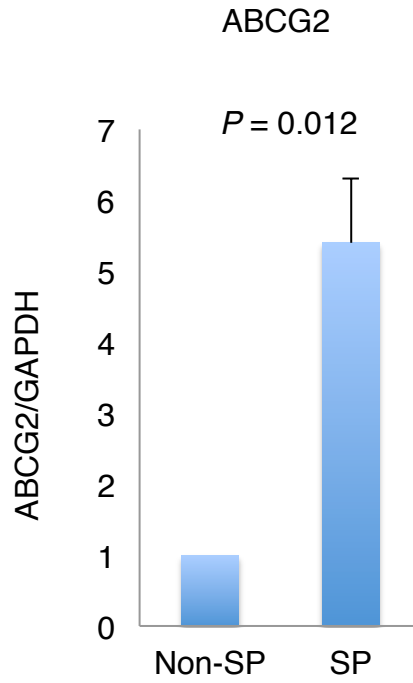

c

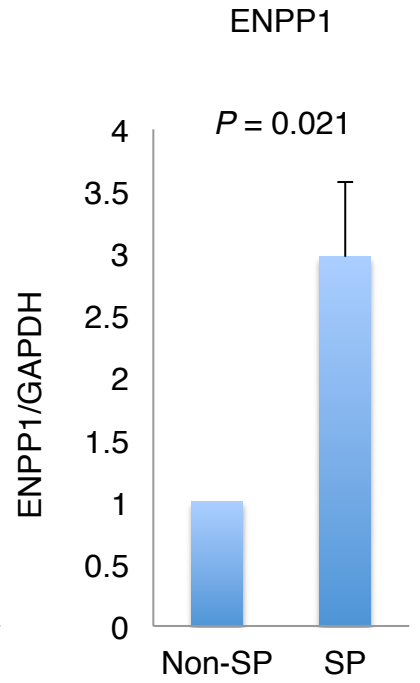

d

ENPP1 3'UTR assay

MCF7 cells

$P = 0.047$

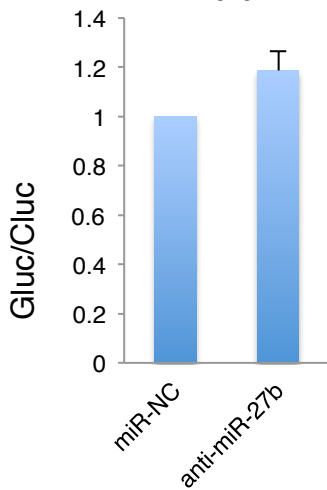

e

MCF7-luc  
transfectants

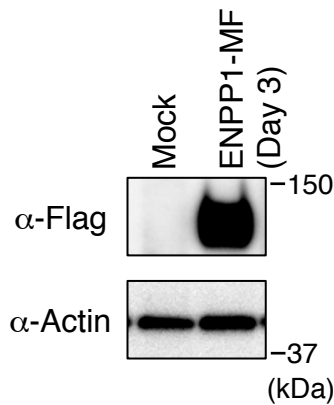

g

293T cells

1. ABCG2-HA+GFP
2. ABCG2-HA+ENPP1-MF

Co-IP with anti-HA

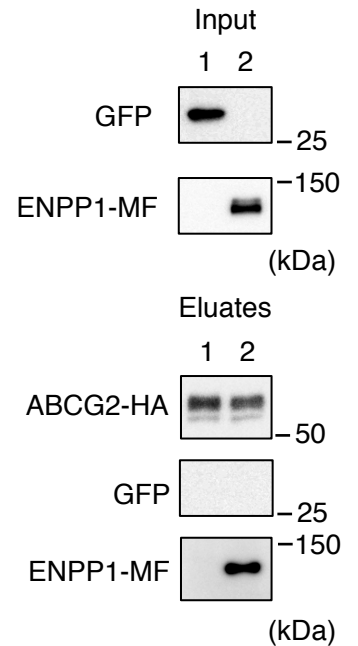

f

293T cells

(kDa)

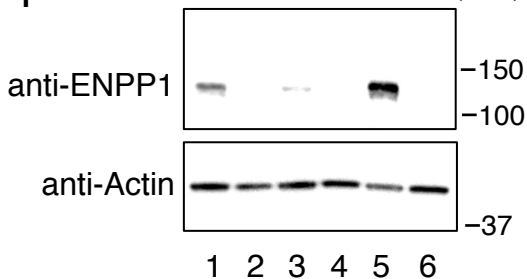

1. shNC
2. shENPP1 site1 (CDS)
3. shENPP1 site2 (3'UTR)
4. shENPP1 site3 (CDS)
5. shENPP1 site4 (CDS)
6. shENPP1 site5 (CDS)

**Supplementary Fig. 8. Functional analysis of ENPP1.**

(a–c) The expression levels of *ENPP1* and *ABCG2* in the SP-fraction of MCF7 cells, as determined by qRT-PCR analysis coupled with cell sorting. Data are represented as the mean  $\pm$  SD of  $n = 3$  replicates. Statistical significance was determined by Student's *t*-test.

(d) Luciferase activities in MCF7 cells transfected with the pTK-GLuc reporter construct containing the wild-type 3'UTR of *ENPP1* (50 ng), an expression vector harbouring a miR-27b antisense sequence or a non-specific miRNA sequence (miR-NC), and the pSV40-cLuc vector (50 ng). The ratio of *Gaussia* to *Cypridina* luciferase activity was determined. Data are represented as the mean  $\pm$  SD of  $n = 3$  replicates. Statistical significance was determined by Student's *t*-test.

(e) Immunoblot analysis of ENPP1 expression in mock transfected MCF7-luc cells or MCF7-luc cells transiently expressing ENPP1-MF.

(f) Efficiency of knockdown of ENPP1 in 293T cells.

(g) Co-immunoprecipitation analyses of 293T cells expressing ENPP1-MF and ABCG2-HA.



**a**

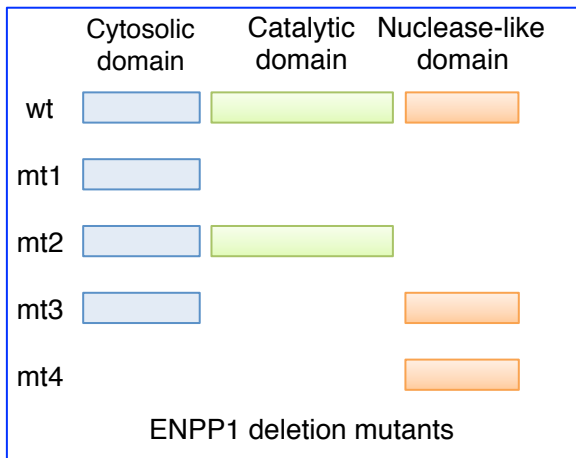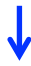

Co-immunoprecipitation with 293T cells

1. Co-transfection of ABCG2-HA and ENPP1 deletion mutants into 293T cells.
2. Co-immunoprecipitation with Flag-tag.

**b**

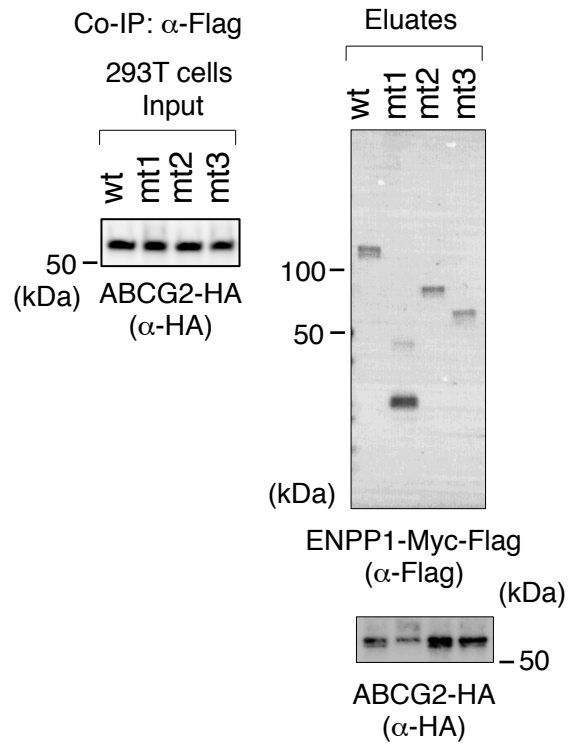

**c**

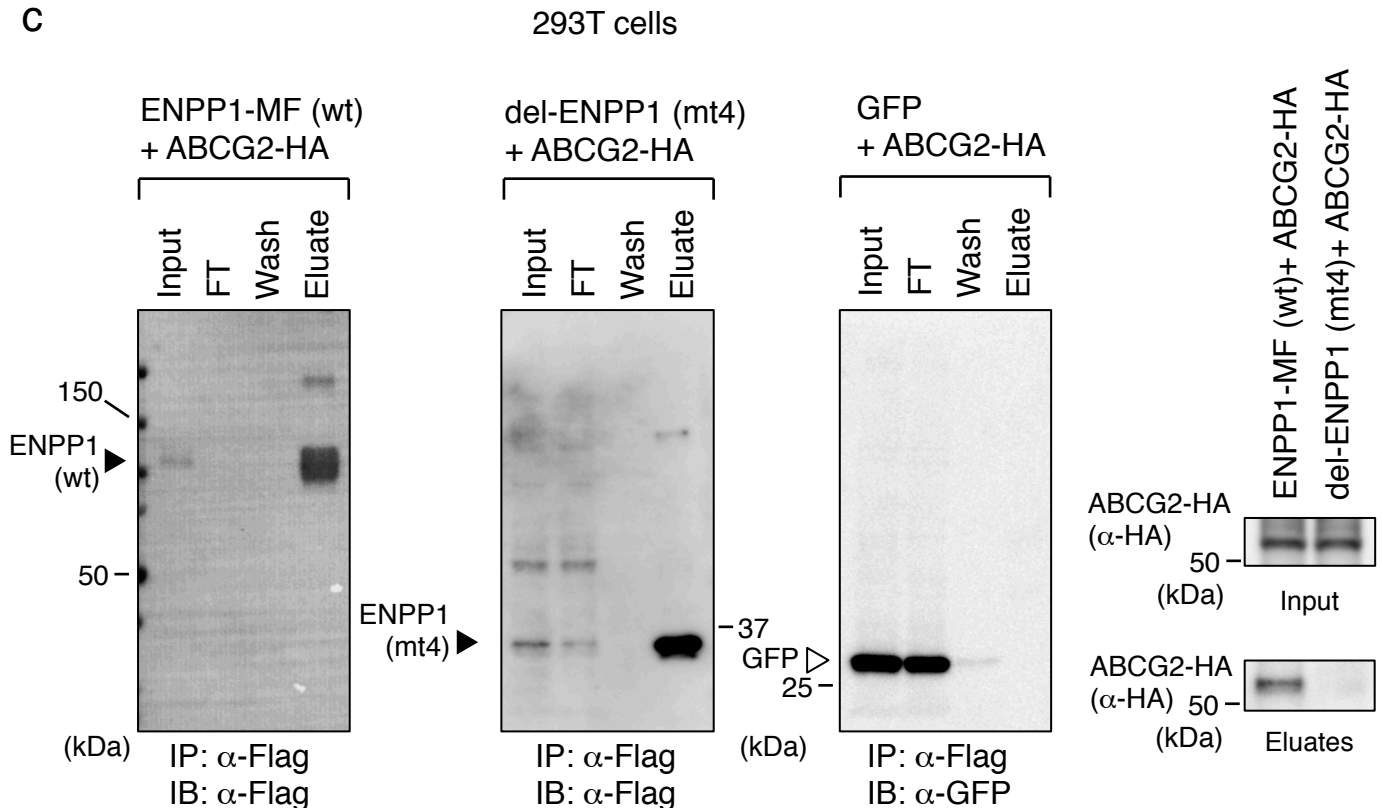

**Supplementary Fig. 9. The N-terminal region of ENPP1 is important for the physical interaction with ABCG2.**

- (a) A schematic illustration of the ENPP1 deletion mutants used in the experiment shown in (b).
- (b) Co-immunoprecipitation analyses of 293T cells expressing ABCG2-HA and the ENPP1 deletion mutants.
- (c) Co-immunoprecipitation analyses of 293T cells expressing ABCG2-HA and ENPP1-MF, an ENPP1 deletion mutant (mt4), or GFP as a control.

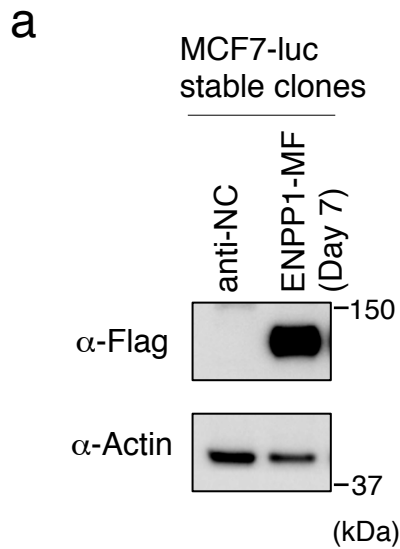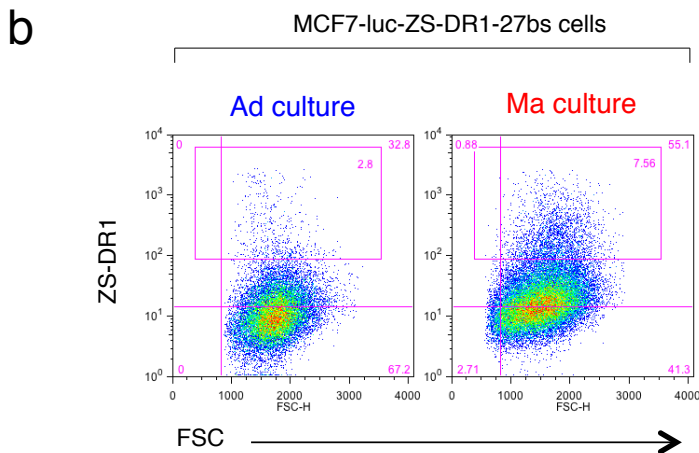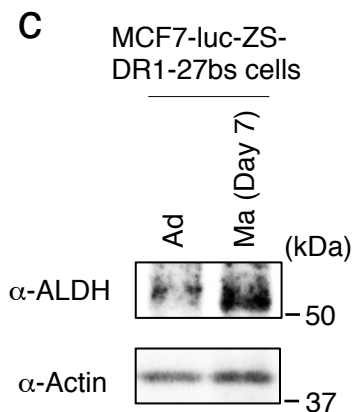

**Supplementary Fig. 10. Mammosphere culture for CSC generation.**

- (a) Immunoblot analyses of ENPP1 expression in MCF7-luc cells stably expressing ENPP1-MF.
- (b) Flow cytometric analysis of ZS-DR1 positive cells, representing those in which miR-27b was down-regulated, grown under adherent (Ad) and mammosphere (Ma) culture conditions.
- (c) Immunoblot analysis of ALDH expression in MCF7-luc ZS-DR1-27bs cells grown under Ad or Ma culture conditions for 7 days. b-actin was used as a loading control.

a

MCF7-luc ENPP1-MF (day 34)

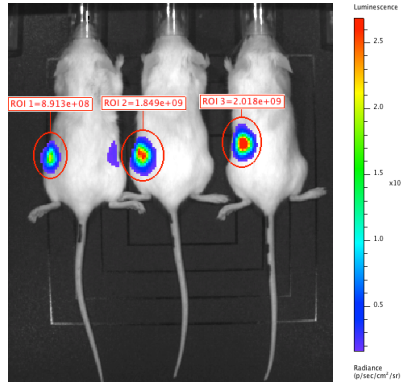

b

MCF7-luc derivatives (day 31)

MCF7-luc ZS-DR1-27bs  
(as technical control)

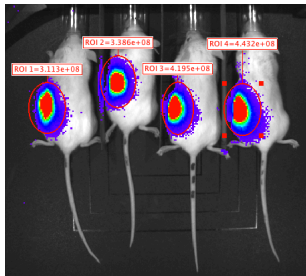

MCF7-luc shENPP1+DMSO

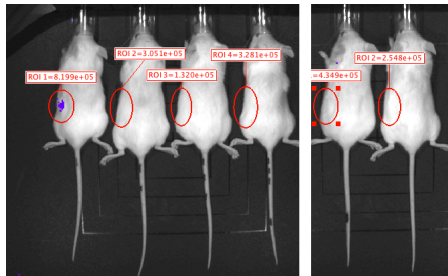

MCF7-luc shENPP1+DOC

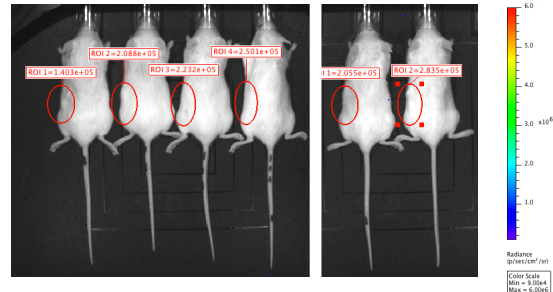

**Supplementary Fig. 11. The role of ENPP1 in tumourigenicity of MCF7-luc cells.**

(a) Bioluminescent images of tumours in NOD/SCID mice that were subcutaneously injected with MCF7-luc ENPP1-MF cells (n = 3 animals and  $10^6$  cells per animal).

(b) Bioluminescence images of tumours in NOD/SCID mice that were injected with or without docetaxel-treated MCF7-luc cell derivatives. After exposure to 5 nM docetaxel for 4 days, the cells were injected into the mammary fat pad of the mice (n = 6 animals and  $10^5$  cells per animal). MCF7-luc ZS-DR-27bs cells were used as a positive control (n = 4 animals and  $10^5$  cells per animal).

**a** **Figure 8b**

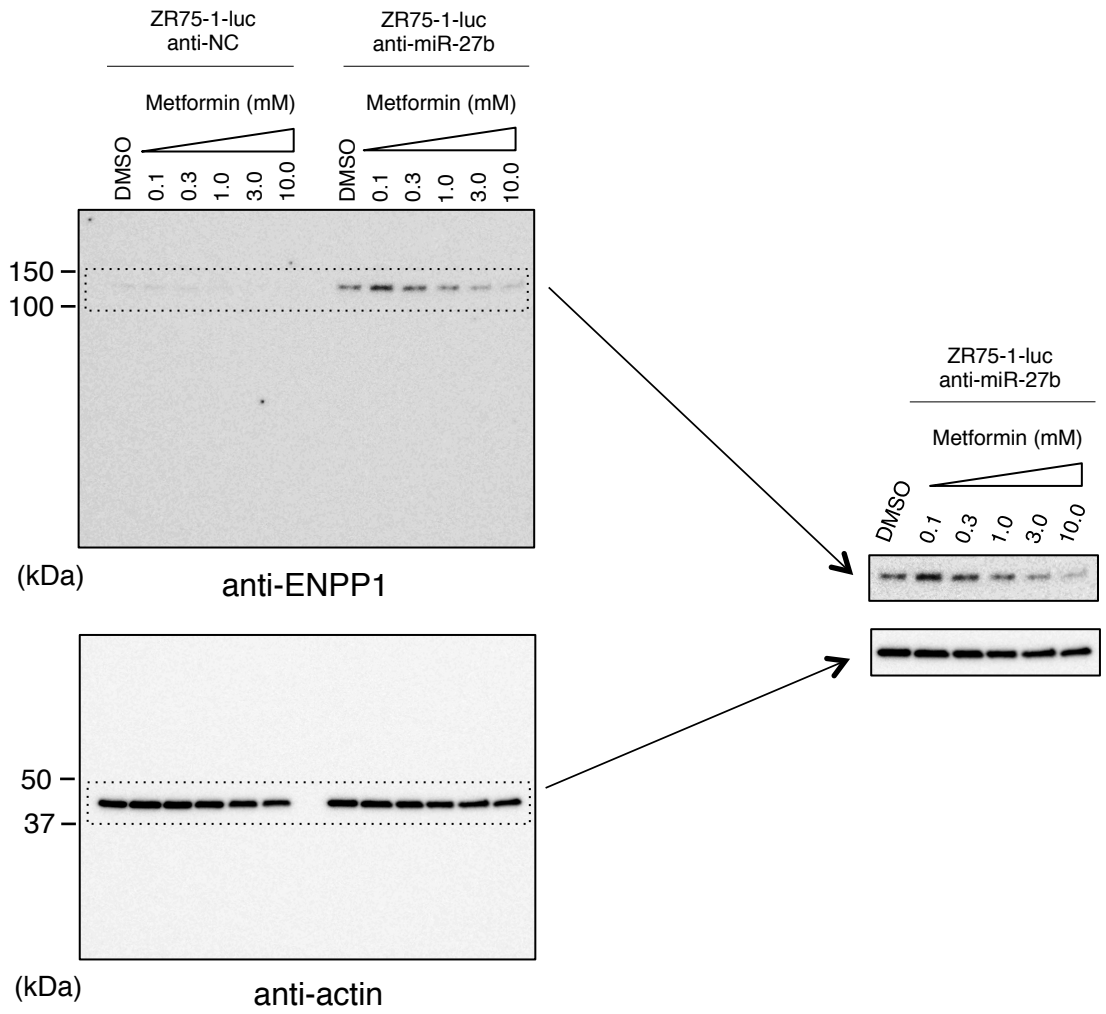

**b**

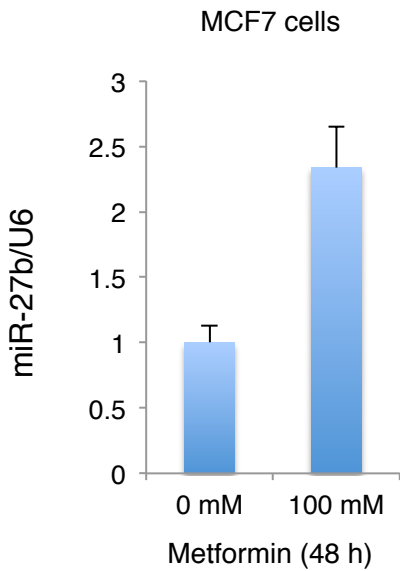

**c**

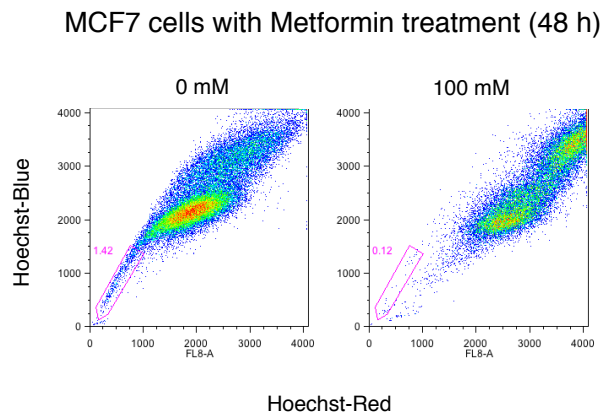

**Supplementary Fig. 12. Metformin induces miR-27b-mediated suppression of ENPP1.**

(a) Original data of western blot analysis in Figure 8b. Immunoblot analyses of ENPP1 expression in ZR75-1-luc anti-NC and anti-miR-27b cells incubated with metformin (0.1–10 mM) for 72 h. b-actin was used as a loading control.

(b) QRT-PCR analysis in MCF7 cells after 48 h incubation of 100 mM metformin. Data are represented as the mean  $\pm$  SD of n = 3 replicates.

(c) Flow cytometric analysis of the SP-fractions of MCF7 cells after 48 h incubation of 100 mM metformin.

a

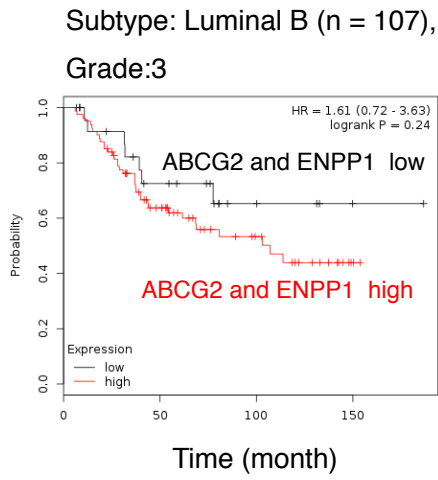

b

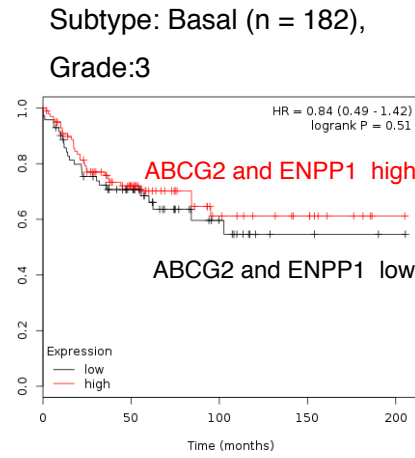

c

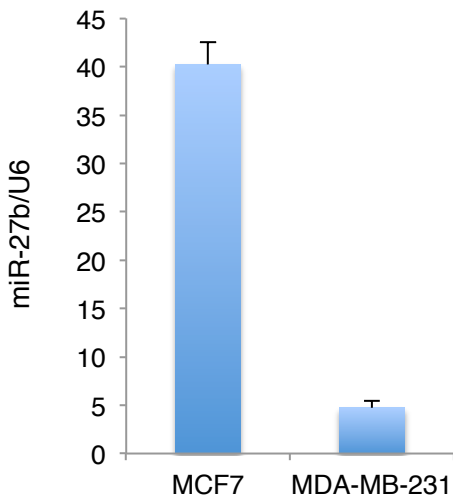

d

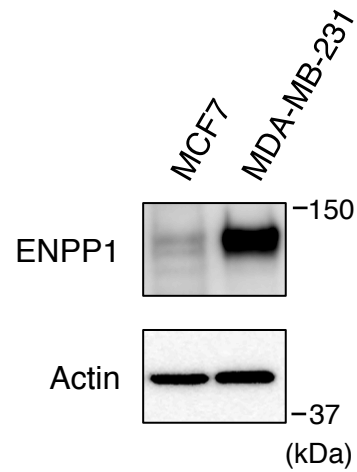

e

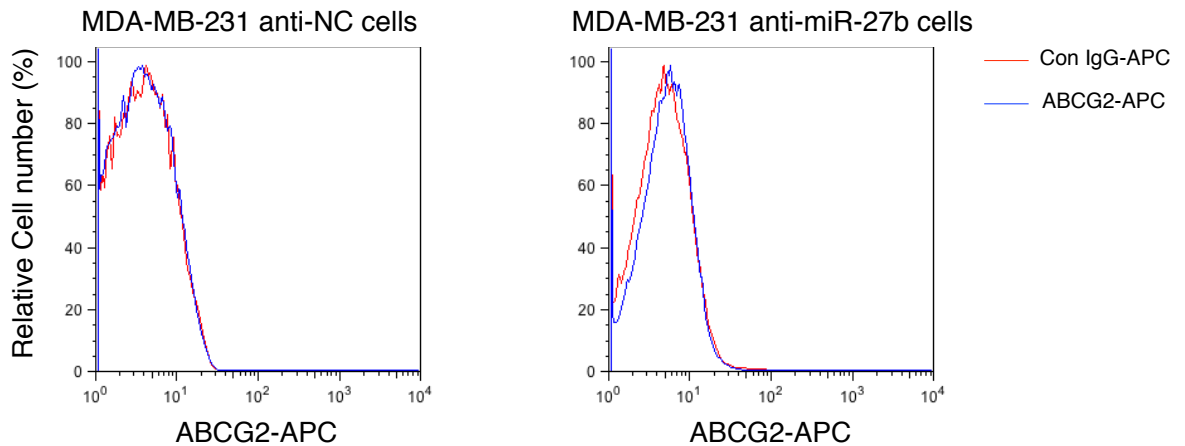

**Supplementary Fig. 13. Evaluation of miR-27b, ENPP1 and ABCG2 expression in luminal B and basal-type breast cancer.**

(a) Kaplan-Meier representation of the probability of recurrence-free survival in 107 luminal B-type breast cancer cases classified according to the expression levels of *ABCG2* and *ENPP1*. The *P*-value was calculated using a log rank test.

(b) Kaplan-Meier representation of the probability of recurrence-free survival in 182 basal-type breast cancer cases classified according to the expression levels of *ABCG2* and *ENPP1*. The *P*-value was calculated using a log rank test.

(c) A qRT-PCR analysis of relative miR-27b expression levels in MCF7 and basal-type MDA-MB-231 breast cancer cells. The expression level of *RNU6B* was used for normalization. Data are represented as the mean  $\pm$  SD of  $n = 3$  replicates.

(d) The expression level of ENPP1 protein in MCF7 and MDA-MB-231 cells.

(e) Flow cytometric analysis of MDA-MB-231 derivatives.



| Patient ID | Diagnosis                     | Stage |
|------------|-------------------------------|-------|
| Patient_1  | Infiltrating ductal carcinoma | IIB   |
| Patient_2  | Infiltrating ductal carcinoma | IIA   |
| Patient_3  | Infiltrating ductal carcinoma | IIIC  |

Patient\_1

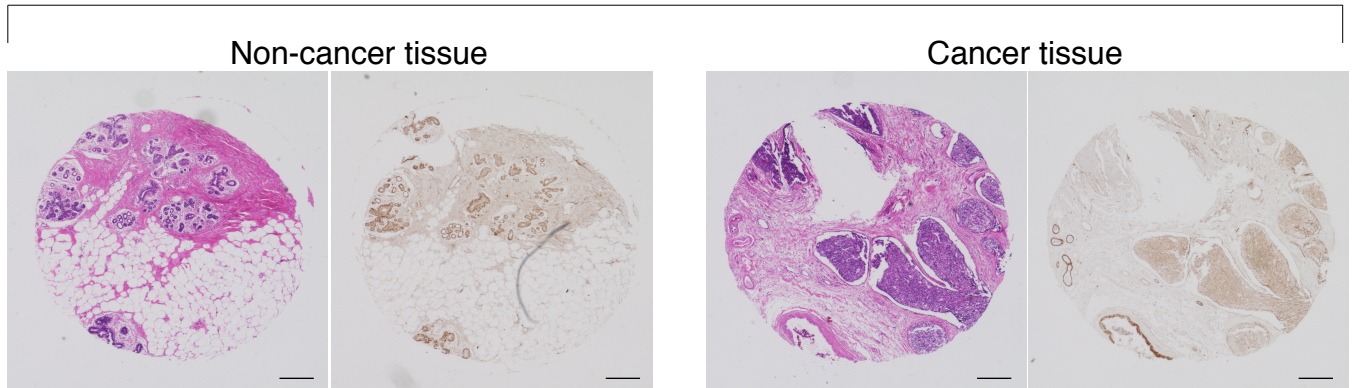

Patient\_2

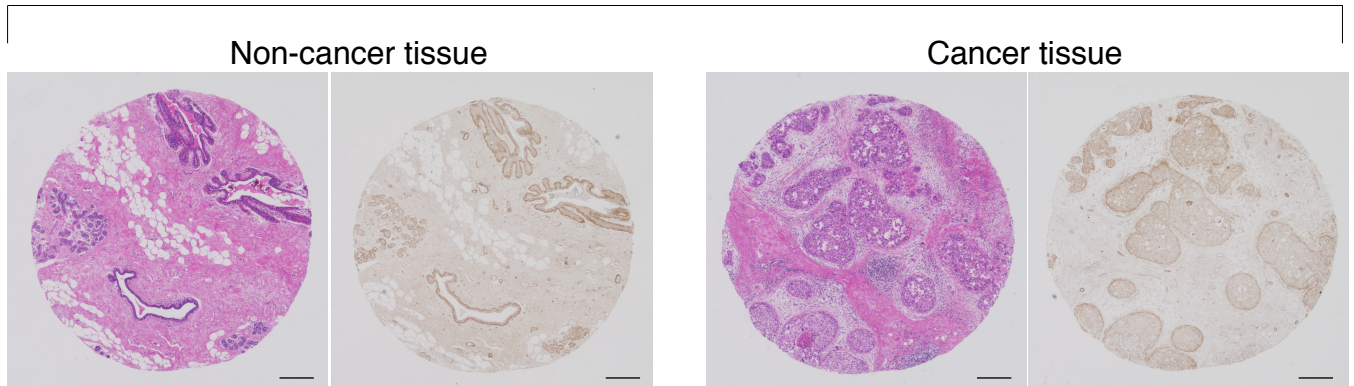

Patient\_3

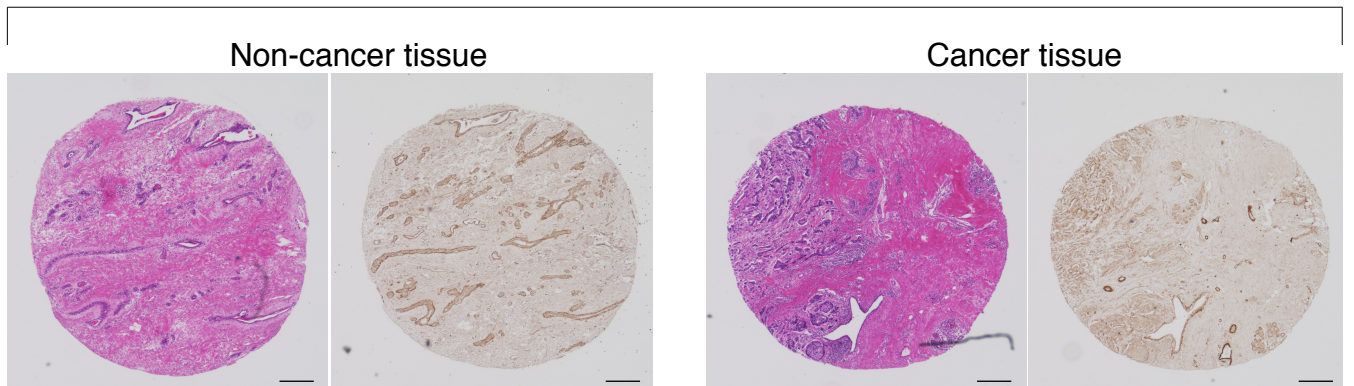

**Supplementary Fig. 14. The expression of ENPP1 in breast cancer tissues.**

Immunohistochemical staining of ENPP1 (brown) in normal breast and cancer tissues classified by the T-stage, as shown in the upper panel. Scale bar, 200 mm.

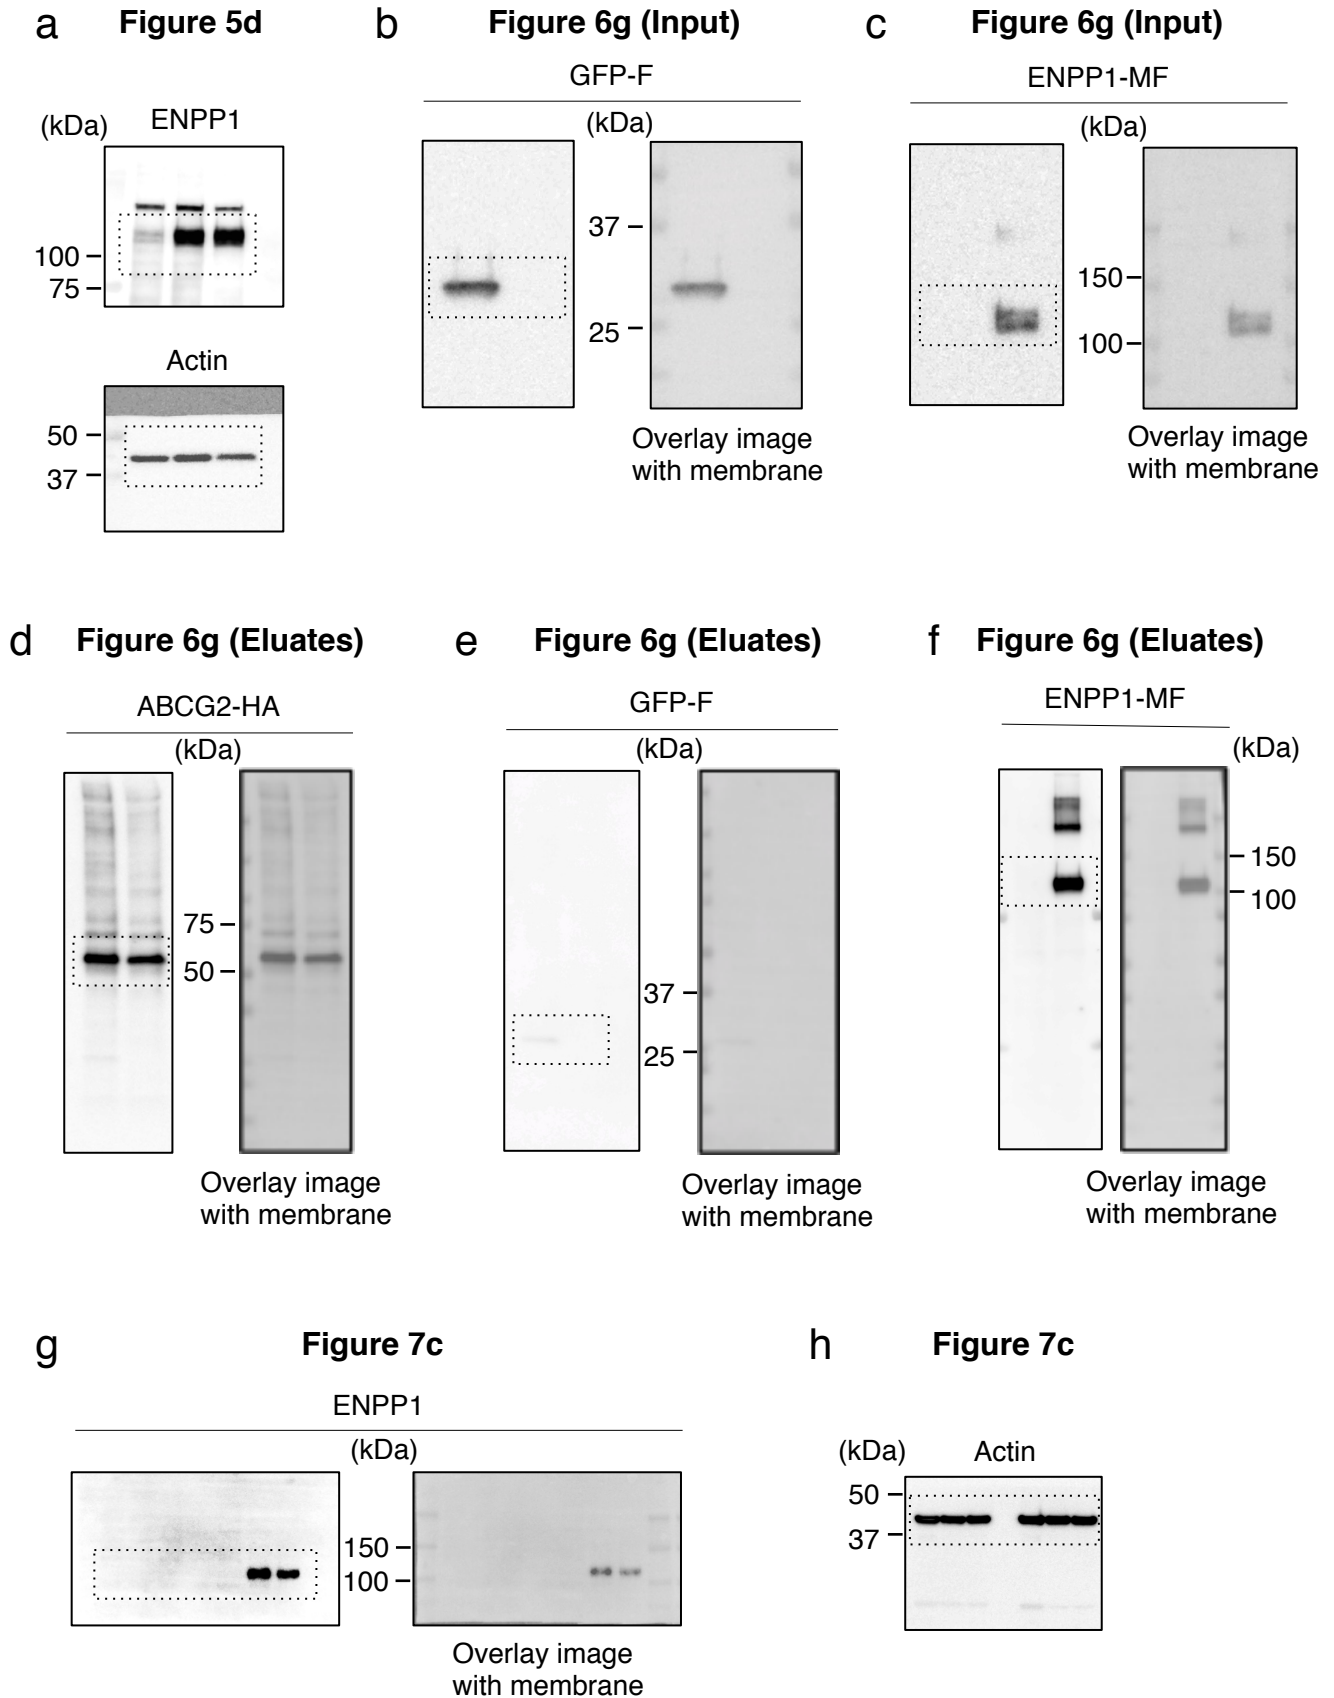

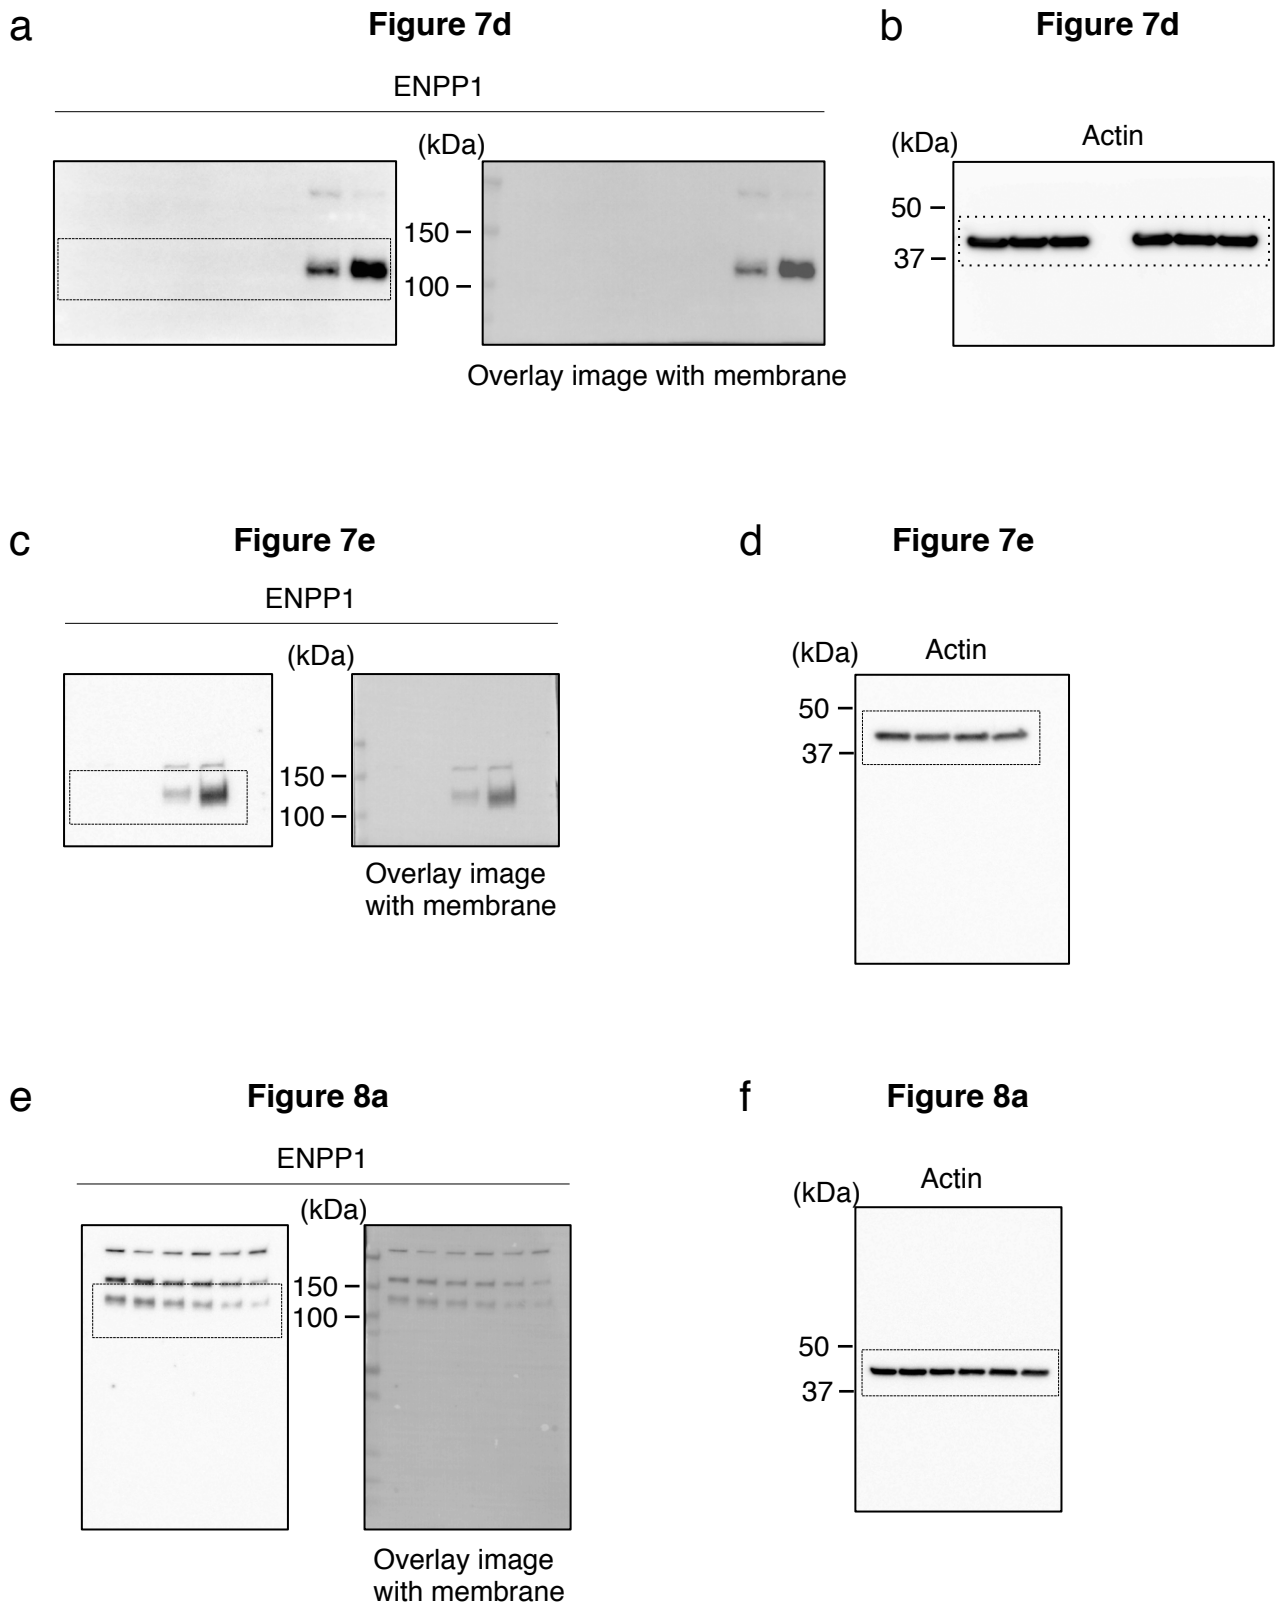

Supplementary Table 1

| Patient ID | Recurrence     | Subtype (Luminal) |
|------------|----------------|-------------------|
| 1          | non recurrence | A                 |
| 2          | non recurrence | A                 |
| 3          | recurrence     | B                 |
| 4          | non recurrence | A                 |
| 5          | recurrence     | B                 |
| 6          | non recurrence | A                 |
| 7          | recurrence     | B                 |
| 8          | recurrence     | A                 |
| 9          | recurrence     | B                 |
| 10         | recurrence     | A                 |
| 11         | recurrence     | B                 |
| 12         | recurrence     | B                 |
| 13         | non recurrence | B                 |
| 14         | recurrence     | A                 |
| 15         | non recurrence | B                 |
| 16         | non recurrence | A                 |
| 17         | non recurrence | B                 |
| 18         | non recurrence | A                 |
| 19         | recurrence     | A                 |
| 20         | non recurrence | A                 |
| 21         | recurrence     | B                 |
| 22         | recurrence     | B                 |
| 23         | non recurrence | A                 |
| 24         | non recurrence | A                 |
| 25         | non recurrence | A                 |
| 26         | non recurrence | B                 |

Clinical information of breast cancer patients in NCC

**Supplementary Table 1. Clinical parameters of the breast cancer patients included in the study.**

# Supplementary Table 2

|      |           | up-regulated genes                    |                  |            | down-regulated genes                    |                       |            |             |                      |           |             |
|------|-----------|---------------------------------------|------------------|------------|-----------------------------------------|-----------------------|------------|-------------|----------------------|-----------|-------------|
|      |           | : Fold change (> 2-fold, $p < 0.05$ ) |                  |            | : Fold change (< 0.7-fold, $p < 0.05$ ) |                       |            |             |                      |           |             |
| rank | GeneName  | SystematicName                        | MCF7-luc anti-NC |            |                                         | MCF7-luc anti-miR-27b |            |             | MCF7-luc miR-27b o.e |           |             |
|      |           |                                       | Normalized       | Raw        | FoldChange                              | Normalized            | Raw        | FoldChange  | Normalized           | Raw       | FoldChange  |
| 1    | UGT2B15   | NM_001076                             | 0.171823992      | 70.500435  | 1                                       | 6.803261294           | 2553.0068  | 39.59436176 | 0.086143634          | 32.29355  | 0.501348114 |
| 2    | UGT2B11   | NM_001073                             | 0.171146738      | 70.22255   | 1                                       | 3.593965351           | 1348.6808  | 20.99932137 | 0.108496138          | 40.67306  | 0.63393635  |
| 3    | ENPP1     | NM_006208                             | 0.085093503      | 34.914383  | 1                                       | 1.37263545            | 515.0987   | 16.13090773 | 0.053297941          | 19.980349 | 0.626345591 |
| 4    | PP14571   | NR_024014                             | 0.056929084      | 23.358343  | 1                                       | 0.881845047           | 330.92322  | 15.49023773 | 0.030569865          | 11.46004  | 0.536981503 |
| 5    | TNFRSF11B | NM_002546                             | 0.11758256       | 48.244843  | 1                                       | 1.778106577           | 667.2568   | 15.12219649 | 0.056300362          | 21.10589  | 0.47881558  |
| 6    | TNFRSF11B | NM_002546                             | 0.122226414      | 50.15024   | 1                                       | 1.845322535           | 692.48016  | 15.09757568 | 0.07817437           | 29.306038 | 0.639586548 |
| 7    | FAM189A2  | NM_004816                             | 0.090335083      | 37.065037  | 1                                       | 1.292743186           | 485.11792  | 14.31053298 | 0.055410327          | 20.772242 | 0.613386577 |
| 8    | TNFRSF11B | NM_002546                             | 0.137708164      | 56.502502  | 1                                       | 1.922388869           | 721.4      | 13.95987579 | 0.085222247          | 31.948132 | 0.618861252 |
| 9    | TNFRSF11B | NM_002546                             | 0.142341732      | 58.40369   | 1                                       | 1.890044628           | 709.26245  | 13.27821857 | 0.086547413          | 32.444923 | 0.608025569 |
| 10   | TNFRSF11B | NM_002546                             | 0.142962849      | 58.65853   | 1                                       | 1.802740326           | 676.50085  | 12.60985167 | 0.061049953          | 22.886427 | 0.427033691 |
| 11   | TNFRSF11B | NM_002546                             | 0.160841578      | 65.99428   | 1                                       | 1.906004466           | 715.25183  | 11.85019751 | 0.078190433          | 29.312054 | 0.48613321  |
| 12   | LHPF      | NM_005780                             | 0.130971353      | 53.738346  | 1                                       | 1.359304761           | 510.09604  | 10.37864178 | 0.067282037          | 25.222712 | 0.513715675 |
| 13   | ENTPD8    | NM_001033113                          | 0.193029025      | 79.20099   | 1                                       | 1.871061203           | 702.1387   | 9.693159897 | 0.128777951          | 48.276314 | 0.667142937 |
| 14   | DHRS2     | NM_182908                             | 3.394289693      | 1392.6978  | 1                                       | 32.83051327           | 12320.057  | 9.672277926 | 1.722935269          | 645.8944  | 0.507598179 |
| 15   | TIMP3     | NM_000362                             | 0.102712787      | 42.14368   | 1                                       | 0.847886664           | 318.18008  | 8.254928046 | 0.036234304          | 13.583528 | 0.352773061 |
| 16   | KRTAP3-1  | NM_031958                             | 0.140965146      | 57.83886   | 1                                       | 1.047291309           | 393.00903  | 7.429434435 | 0.079545399          | 29.820005 | 0.564291256 |
| 17   | KRTAP3-1  | NM_031958                             | 0.149649794      | 61.40222   | 1                                       | 0.964022382           | 361.7614   | 6.441855717 | 0.095142728          | 35.66714  | 0.635769186 |
| 18   | PTGER4    | NM_000958                             | 0.399231096      | 163.80688  | 1                                       | 2.393677017           | 898.2565   | 5.995717876 | 0.262617325          | 98.450096 | 0.657807791 |
| 19   | TFF3      | NM_003226                             | 0.920477767      | 377.67783  | 1                                       | 5.279932918           | 1981.36    | 5.736078707 | 0.517156093          | 193.87164 | 0.561834421 |
| 20   | PTPN21    | NM_007039                             | 0.431412176      | 177.011    | 1                                       | 2.391293147           | 897.36273  | 5.542943108 | 0.261688041          | 98.10169  | 0.606584736 |
| 21   | FAM129A   | NM_052966                             | 0.170983901      | 70.15574   | 1                                       | 0.922551024           | 346.19864  | 5.395543195 | 0.11053901           | 41.438915 | 0.646487822 |
| 22   | TFF3      | NM_003226                             | 14.9351125       | 6127.968   | 1                                       | 79.50953624           | 29836.94   | 5.323665036 | 5.919430981          | 2219.0793 | 0.396343247 |
| 23   | GPC6      | NM_005708                             | 0.105244358      | 43.182404  | 1                                       | 0.515525659           | 193.45738  | 4.8983686   | 0.054362466          | 20.379412 | 0.516535675 |
| 24   | AKO94885  | AKO94885                              | 0.087153765      | 35.75972   | 1                                       | 0.408925178           | 153.45425  | 4.691996704 | 0.05102245           | 19.127312 | 0.58543025  |
| 25   | TFF3      | NM_003226                             | 76.46270321      | 31373.123  | 1                                       | 356.9464887           | 133948.48  | 4.668243127 | 30.72380515          | 11517.751 | 0.401814268 |
| 26   | SERPINA3  | NM_001085                             | 0.131265619      | 53.85908   | 1                                       | 0.597163267           | 224.09294  | 4.549274    | 0.045063847          | 16.893549 | 0.343302745 |
| 27   | EPB41L2   | NM_001431                             | 0.064537267      | 26.48004   | 1                                       | 0.291786755           | 109.49659  | 4.521213356 | 0.032943051          | 12.349697 | 0.510450051 |
| 28   | PRSS23    | NM_007173                             | 0.750971665      | 308.1283   | 1                                       | 3.355039612           | 1259.0206  | 4.467598136 | 0.473390021          | 177.46458 | 0.630370017 |
| 29   | EPHA4     | NM_004438                             | 1.2391712        | 508.43942  | 1                                       | 5.3652396             | 2013.3721  | 4.329700043 | 0.803630336          | 301.26514 | 0.648522444 |
| 30   | EPHA4     | NM_004438                             | 1.198946597      | 491.93494  | 1                                       | 5.113476961           | 1918.8965  | 4.264974749 | 0.802452733          | 300.82376 | 0.669298145 |
| 31   | EPHA4     | NM_004438                             | 1.157666948      | 474.9978   | 1                                       | 4.919559017           | 1846.1251  | 4.249546061 | 0.74135299           | 277.91864 | 0.640385382 |
| 32   | KRT32     | NM_002278                             | 0.232965173      | 95.58703   | 1                                       | 0.983189459           | 368.95398  | 4.220328072 | 0.155631554          | 58.343204 | 0.668046439 |
| 33   | EPHA4     | NM_004438                             | 1.238061971      | 507.98453  | 1                                       | 5.220335758           | 1958.9961  | 4.216538332 | 0.788284657          | 295.51245 | 0.636708562 |
| 34   | NRCAM     | NM_001037132                          | 0.756246193      | 310.29248  | 1                                       | 3.185705711           | 1195.4761  | 4.212524626 | 0.230725122          | 86.4943   | 0.305092606 |
| 35   | EPHA4     | NM_004438                             | 1.241095816      | 509.2292   | 1                                       | 5.18871214            | 1947.1288  | 4.18075065  | 0.804057555          | 301.4253  | 0.647860983 |
| 36   | ADM       | NM_001124                             | 1.63416516       | 670.50793  | 1                                       | 6.509085207           | 2442.6145  | 3.983125675 | 0.629032542          | 235.81189 | 0.384925929 |
| 37   | ADM       | NM_001124                             | 1.816843559      | 745.4621   | 1                                       | 7.115827808           | 2670.303   | 3.916588071 | 0.677379096          | 253.93611 | 0.372832924 |
| 38   | NEFH      | NM_0021076                            | 0.125081298      | 51.321617  | 1                                       | 0.479550083           | 179.95706  | 3.833907155 | 0.080573855          | 30.205551 | 0.644171885 |
| 39   | ADM       | NM_001124                             | 1.778208014      | 729.60944  | 1                                       | 6.701551789           | 2514.8406  | 3.768710824 | 0.680892619          | 255.25328 | 0.382909431 |
| 40   | ADM       | NM_001124                             | 1.798189992      | 737.8079   | 1                                       | 6.753095688           | 2534.182   | 3.755496204 | 0.681275297          | 255.39674 | 0.37886725  |
| 41   | ADM       | NM_001124                             | 1.80274866       | 739.6788   | 1                                       | 6.65968343            | 2499.1287  | 3.694182986 | 0.6898642            | 258.6165  | 0.382673534 |
| 42   | ADM       | NM_001124                             | 1.688242092      | 692.6958   | 1                                       | 6.151666105           | 2308.4893  | 3.643829361 | 0.650337238          | 243.79866 | 0.385215628 |
| 43   | ADM       | NM_001124                             | 1.825600384      | 749.05524  | 1                                       | 6.643480669           | 2493.0486  | 3.63906621  | 0.659841078          | 247.3614  | 0.36143785  |
| 44   | LMO2      | NM_005574                             | 0.453496839      | 186.07256  | 1                                       | 1.626638922           | 610.4163   | 3.586880397 | 0.278231275          | 104.30343 | 0.613524176 |
| 45   | RGAG4     | NM_001024455                          | 0.402949542      | 165.33266  | 1                                       | 1.418184762           | 532.1914   | 3.519509548 | 0.240257038          | 90.06762  | 0.596245964 |
| 46   | LMO2      | NM_005574                             | 0.457166248      | 187.57812  | 1                                       | 1.583777204           | 594.3319   | 3.464335372 | 0.276912503          | 103.80904 | 0.605715107 |
| 47   | FGF13     | NM_004414                             | 0.082078405      | 33.67727   | 1                                       | 0.27955683            | 104.907196 | 3.405973004 | 0.050146576          | 18.798962 | 0.610959435 |
| 48   | NRCAM     | NM_001193582                          | 0.254636282      | 104.478806 | 1                                       | 0.862461762           | 323.64948  | 3.387034073 | 0.09525682           | 35.70991  | 0.374089739 |
| 49   | EDN1      | NM_001955                             | 4.307102927      | 1767.2314  | 1                                       | 14.48592394           | 5436.026   | 3.363263935 | 2.864144142          | 1073.7109 | 0.664981588 |
| 50   | LMO2      | NM_005574                             | 0.458303021      | 188.04456  | 1                                       | 1.540295945           | 578.0153   | 3.360867974 | 0.26935443           | 100.97565 | 0.587721263 |

## Supplementary Table 2. Identification of miR-27b targets.

Candidate miR-27b target genes that were up-regulated in MCF7-luc anti-miR-27b cells and down-regulated in MCF7-luc miR-27b o.e. cells compared with MCF7-luc cells. The total RNA was labelled with Cy3 using the Low Input Quick Amp Labeling Kit (Agilent) and hybridized to a SurePrint G3 Human GE 8x60 K array (Agilent), according to the manufacturer's protocol. Data analysis was performed using GeneSpring software.





Supplementary Table 4

| Primer name                                                                                                                         | Nucleotide sequence                                                                                                                                                          |
|-------------------------------------------------------------------------------------------------------------------------------------|------------------------------------------------------------------------------------------------------------------------------------------------------------------------------|
| For qPCR<br>GAPDH Fw<br>GAPDH Rv<br>ENPP1 Fw<br>ENPP1 Rv<br>ABCG2 Fw<br>ABCG2 Rv                                                    | TGAAGGTCGGAGTCAACGATTTGGT<br>GAAGATGGTGATGGGATTTC<br>GAACTTGACAGATGCCTGA<br>GGGACATCAGAGGGTCTCAA<br>AGCTGCAAGGAAAGATCCAA<br>TCCAGACACACCACGGATAA                             |
| For cloning<br>Cloning for 3'UTR of ENPP1 Fw<br>Cloning for 3'UTR of ENPP1 Fw<br>ENPP1 3'UTR mutation Fw<br>ENPP1 3'UTR mutation Rv | AAAGCGGCCGCAGAGTTAGAACGGAGCCCTCGG<br>TTTCTCGAGGCCCTTAGGCCGTTGAAGAATGGT<br>AAGTAGTTACTCCCATTGTCTGGATACCAGATATTTGAATCTTTCTTAC<br>ACAATGGGAGTAACTACTTCTCCTTTAAGAGAAGCAGAAAGGCAG |

Supplementary Table 4a: Primer sequences used for this study.

|                                                                                                                                                                                                                                                                                                                                                                 |
|-----------------------------------------------------------------------------------------------------------------------------------------------------------------------------------------------------------------------------------------------------------------------------------------------------------------------------------------------------------------|
| 1. anti-miR-27b (miR-ZIP-27b)                                                                                                                                                                                                                                                                                                                                   |
| 5'-GGATCCGTTACAGCGGCTAAGTCCTAC-CTTCCTGTCAG- <b>GCAGAACTTAGCCACTGTGA</b> ATTTTTGAATTC-3'                                                                                                                                                                                                                                                                         |
| 2. anti-miR-23b (miR-ZIP-23b)                                                                                                                                                                                                                                                                                                                                   |
| 5'-GGATCCGATCACATCGCCAGGGACTAACCTTCCTGTCAG- <b>GGTAATCCCTGGCAATGTGAT</b> TTTTTTGAATTC-3'                                                                                                                                                                                                                                                                        |
| 3. Scramble Hairpin Control - Construct (for miRZip)                                                                                                                                                                                                                                                                                                            |
| 5'-gGATCCCTAAGGTTAAGTCGCCCTCGCTCTAGCGAGGGCGACTTAACCTTAGGTTTTTTGAATTc-3'                                                                                                                                                                                                                                                                                         |
| 4. miR-27b o.e.                                                                                                                                                                                                                                                                                                                                                 |
| The sequence of hsa-mir-27b precursor was inserted.                                                                                                                                                                                                                                                                                                             |
| 5'-AGAACAGGTGCATCTCGTAGCTCTTCTTTGGAAACAAAAGAAGCCACCAGCTGAGGAAGATGCTCACCGG<br>TCACCGTCCCTTTATTTATGCCAGCGATGACCTCTCTAACAAGGTGCAGAGCTTAGCTGATTGGTGAACA<br>→ miR-27b-3p sequence<br>GTGATTGGTTTTCCGCTTTG <b>TTCACAGTGGCTAAGTTCTGC</b> ACCTGAAGAGAAGGTGAGATGGGGACAGTTA<br>AGTTGGAGCCGCTGGGGCAGAGGCCGTTGCTGACGGGCCGCGCTGCTGCACAGTCAGCTTGGGTGC<br>GGAGCGCGATCCTGGAG-3' |

Supplementary Table 4b: Details of constructs for miR-27b knockdown and overexpression.

|                                                     |
|-----------------------------------------------------|
| miRCURY LNA™ microRNA Power Inhibitor (EXIQON)      |
| 1. LNA miR-27b (hsa-miR-27b-3p): AGAACTTAGCCACTGTGA |
| 2. Control LNA: TAACACGTCTATACGCCCA                 |

Supplementary Table 4c: The sequences of LNA for miR-27b knockdown.
